# Supplementary material for: Evolutionary, structural and functional analysis of the caleosin/peroxygenase gene family in the Fungi
Source: BMC Genomics. 2018 Dec 28;19:976. doi: 10.1186/s12864-018-5334-1 (PMC6309107; doi:10.1186/s12864-018-5334-1)
Supplement: Supplementary file 8 — Table S6C. Intron/exon numbers in 231 Ascomycota CLO/PXG genes. (XLSX 24 kb) [file 12864_2018_5334_MOESM8_ESM.xlsx]

## Sheet: Intron_Exon_Ascomycota
Group as per MOTIF distribution	Phylum	Caleosin Name	NCBI Accession Number/GenBank accession Number	Exons	Introns
II	Ascomycota	UreCLO1	XP_002542392	4	3
	Ascomycota	AaCLO1	XP_018390404.1	4	3
	Ascomycota	AaCLO2	OWY45192	4	3
	Ascomycota	AaCLO3	OWY49581	4	3
	Ascomycota	AaCLO4	XP_018381903.	4	3
	Ascomycota	AaCLO5	XP_018379710	3	2
	Ascomycota	AraCLO1	KZM26105	2	1
	Ascomycota	ApuCLO1	KEQ85543	4	3
	Ascomycota	BpaCLO1	XP_007674266	2	1
	Ascomycota	BzeCLO1	XP_007717760	4	3
	Ascomycota	BzeCLO2	XP_007717793	4	3
	Ascomycota	BsoCLO1	XP_007703578	4	3
	Ascomycota	BsoCLO2	XP_007696470	4	3
	Ascomycota	BmaCLO1	XP_014074843	4	3
	Ascomycota	BmaCLO2	XP_014075051	4	3
	Ascomycota	BviCLO1	XP_014550826	4	3
	Ascomycota	BviCLO2	XP_014556389	4	3
	Ascomycota	BoaCLO1	XP_007685144	4	3
	Ascomycota	BoaCLO2	XP_007693914	4	3	Dothideo
	Ascomycota	CaqCLO1	ORY03318	3	2
	Ascomycota	GstCLO1	OCL08545	5	4
	Ascomycota	LpaCLO1	OCK77472	3	2
	Ascomycota	LmaCLO1	XP_003837175	2	1
	Ascomycota	MphCLO1	EKG15417	3	2
	Ascomycota	MgrCLO1	SMQ48305	1	0
	Ascomycota	MgrCLO2	XP_003853612	1	0
	Ascomycota	NpaCLO1	EOD52854	3	2
	Ascomycota	PspCLO1	XP_018033387	3	2
	Ascomycota	PnoCLO1	XP_001800396	2	1
	Ascomycota	PnoCLO2	XP_001805047	2	1
	Ascomycota	PteCLO1	EFQ86779	2	1
	Ascomycota	PteCLO2	EFQ88886	4	3
	Ascomycota	PtrCLO1	XP_001939579	2	1
	Ascomycota	PtrCLO2	XP_001932418	2	1
	Ascomycota	StuCLO1	XP_008027164	4	3
	Ascomycota	SssCLO1	OAL01095	3	2
	Ascomycota	SssCLO2	OAL04181	4	3
	Ascomycota	SlyCLO1	KNG50892	2	1
	Ascomycota	SlyCLO2	KNG46289	3	2
	Ascomycota	ZbrCLO1	KJX93160	1	0
	Ascomycota	ZtrCLO1	SMQ48305	1	0
	Ascomycota	ZtrCLO2	XP_003853612	1	0
	Ascomycota	AacCLO1	XP_020053171.1	5	4
	Ascomycota	AarCLO1	PIG82586.1	5	4
	Ascomycota	AboCLO1	XP_022389625.1	3	2
	Ascomycota	AbrCLO1	OJJ72226.1	5	4
	Ascomycota	AcaCLO1	CEL11310.1	4	3
	Ascomycota	AcrCLO1	OOF96849	5	4
	Ascomycota	AcriCLO1	ODM17720	5	4
	Ascomycota	AfiCLO1	XP_001259303	5	4
	Ascomycota	AflCLO1	XP_002382486	4	3
	Ascomycota	AflCLO2	KOC18508	5	4
	Ascomycota	AfuCLO1	EDP52113	2	1
	Ascomycota	AglCLO1	XP_022398315	5	4
	Ascomycota	AkaCLO1	GAA84711	5	4
	Ascomycota	AleCLO1	GAQ09865	5	4
	Ascomycota	AluCLO1	OJZ86976	5	4
	Ascomycota	AniCLO1	XP_681860	4	3
	Ascomycota	AnigCLO1	EHA21672	3	2
	Ascomycota	AnoCLO1	XP_015410470	5	4
	Ascomycota	AnovCLO1	PKX97680	7	6
	Ascomycota	AorCLO1	XP_023091696	6	5
	Ascomycota	AocCLO1	PLB25315	5	4
	Ascomycota	AruCLO1	EYE95639	5	4
	Ascomycota	AsyCLO1	OJJ57330	3	2
	Ascomycota	AteCLO1	XP_001217883	4	3
	Ascomycota	AthCLO1	OXS04793	4	3
	Ascomycota	AtubCLO1	OJI83544	5	4
	Ascomycota	AtuCLO1	OXN12887	10	9
	Ascomycota	AtuCLO2	OXN32076	10	9
	Ascomycota	AudCLO1	GAO82964	12	11
	Ascomycota	AveCLO1	OJJ05831	4	3
	Ascomycota	AweCLO1	OJJ40137	5	4	Eurotio
	Ascomycota	BspCLO1	GAD91481	5	4
	Ascomycota	CcorCLO1	XP_007723355	5	4
	Ascomycota	CcorCLO2	XP_007724118	4	3
	Ascomycota	CcorCLO3	XP_007728013	1	0
	Ascomycota	CepCLO1	XP_007733338	1	0
	Ascomycota	CepCLO2	XP_007732176	4	3
	Ascomycota	CbaCLO1	XP_016619340	2	1
	Ascomycota	CbaCLO2	XP_016620826	1	0
	Ascomycota	CbaCLO3	XP_016618021	2	1
	Ascomycota	CcaCLO1	XP_008726393	2	1
	Ascomycota	CcaCLO2	XP_008729630	1	0
	Ascomycota	CimCLO1	XP_016254621	1	0
	Ascomycota	CimCLO2	OQU96901	2	1
	Ascomycota	CimCLO3	OQV04849	1	0
	Ascomycota	CpsCLO1	XP_007745757	2	1
	Ascomycota	CpsCLO2	XP_007751329	1	0
	Ascomycota	CyeCLO1	XP_007757044	2	1
	Ascomycota	CyeCLO2	XP_007760308	1	0
	Ascomycota	CapCLO1	XP_007777869	2	1
	Ascomycota	CapCLo2	XP_007776235	2	1
	Ascomycota	CeuCLO1	XP_008716196	1	0
	Ascomycota	EpuCLO1	XP_007785509	4	3
	Ascomycota	EaqCLO1	XP_013258145	1	0
	Ascomycota	EdeCLO1	XP_009154680	4	3
	Ascomycota	EdeCLO2	XP_009153193	1	0
	Ascomycota	EmeCLO1	XP_016225455	1	0
	Ascomycota	EolCLO1	XP_016265223	2	1
	Ascomycota	EolCLO2	XP_016259092	1	0
	Ascomycota	EsiCLO1	KIV81075	2	1
	Ascomycota	EsiCLO2	KIV87627	1	0
	Ascomycota	EspCLO1	XP_016235501	2	1
	Ascomycota	EspCLO2	XP_016241574	1	0
	Ascomycota	EspCLO3	XP_016236729	1	0
	Ascomycota	ExoCLO1	XP_013320696	3	2
	Ascomycota	ExoCLO2	XP_013314749	5	4
	Ascomycota	ExoCLO3	XP_013310602	2	1
	Ascomycota	ExoCLO4	XP_013320808	1	0
	Ascomycota	ExoCLO5	XP_013314748	4	3
	Ascomycota	FmoCLO1	XP_022515129	1	0
	Ascomycota	FmoCLO2	XP_022517311	2	1
	Ascomycota	FerCLO1	XP_018689731	3	2
	Ascomycota	FerCLO2	XP_018698305	1	0
	Ascomycota	FerCLO3	XP_018689731	2	1
	Ascomycota	FmuCLO1	XP_016633601	2	1
	Ascomycota	FmuCLO2	XP_016636891	3	2
	Ascomycota	FmuCLO3	XP_016635945	2	1
	Ascomycota	FnuCLO1	XP_022505496	3	2
	Ascomycota	FnuCLO2	XP_022494531	1	0
	Ascomycota	FpeCLO1	XP_013285671	1	0
	Ascomycota	FpeCLO2	XP_013283359	2	1
	Ascomycota	PanCLO1	OQD72682	6	5
	Ascomycota	ParCLO1	XP_022492540	5	4
	Ascomycota	PchCLO1	KZN87874	5	4
	Ascomycota	PruCLO1	XP_002566471	5	4
	Ascomycota	PruCLO2	XP_002556570	5	4
	Ascomycota	PfrCLO1	KUM60405	5	4
	Ascomycota	PitCLO1	KGO67571	5	4
	Ascomycota	PisCLO1	CRG87595	5	4
	Ascomycota	PpoCLO1	OQD60489	Genome not available
	Ascomycota	PstCLO1	XP_002341072	4	3
	Ascomycota	PatCLO1	XP_017998378	4	3
	Ascomycota	PamCLO1	KIW68434	2	1
	Ascomycota	PamCLO2	KIW63661	1	0
	Ascomycota	UpCLO1	SLM41494	3	2
	Ascomycota	UpCLO2	SLM34933	1	0
	Ascomycota	BgrCLO1	EPQ66680	3	2
	Ascomycota	BciCLO1	CCD55641	3	2
	Ascomycota	BciCLO2	XP_001547230	3	2
	Ascomycota	EnCLO1	KHJ32187.1	4	3
	Ascomycota	GloCLO1	XP_008081073	4	3	Leotio
	Ascomycota	MbrCLO1	XP_007288512	4	3
	Ascomycota	PsuCLO1	CZR63923	3	2
	Ascomycota	SscCLO1	XP_001585964	4	3
	Ascomycota	PomCLO1	CCX32719	Genome not available
	Ascomycota	BbCLO1	XP_008600624	5	4
	Ascomycota	BbCLO2	KGQ04589.1	4	3
	Ascomycota	CgCLO1	XP_001219524	4	3
	Ascomycota	CthCLO1	XP_006695297	4	3
	Ascomycota	CchCLO1	OLN86536	5	4
	Ascomycota	CchCLO2	OLN97370	5	4
	Ascomycota	CorCLO1	ENH77486	5	4
	Ascomycota	CorCLO2	ENH89180	5	4
	Ascomycota	CinCLO1	KZL63384	5	4
	Ascomycota	CinCLO2	OHW97794	5	4
	Ascomycota	CinCLO3	KZL87421	5	4
	Ascomycota	CinCLO4	OHW98824	5	4
	Ascomycota	CglCLO1	EQB46161	5	4
	Ascomycota	CglCLO2	EQB51792	5	4
	Ascomycota	CglCLO3	ELA29034	5	4
	Ascomycota	CfiCLo1	XP_007589946	4	3
	Ascomycota	CgrCLO1	XP_008093681	5	4
	Ascomycota	CgrCLO2	XP_008100032	5	4
	Ascomycota	ChiCLO1	XP_018154127	4	3
	Ascomycota	ChiCLO2	XP_018151131	5	4
	Ascomycota	CnyCLO1	KXH60577	4	3
	Ascomycota	CorcCLO1	XP_022476427	5	4
	Ascomycota	CorcCLO2	XP_022472298	4	3
	Ascomycota	CsaCLO1	KXH36807	4	3
	Ascomycota	CsiCLO1	KXH32822	4	3
	Ascomycota	CsuCLO1	KDN61657	3	2
	Ascomycota	CsuCLO2	KDN60702	4	3
	Ascomycota	CtoCLO1	KZL64696	5	4
	Ascomycota	CtoCLO2	KZL64005	5	4
	Ascomycota	CliCLO1	OIW30458	4	3
	Ascomycota	CmiCLO1	XP_006673497	7	6
	Ascomycota	CbrCLO1	OAA40413	5	4	Sodario
	Ascomycota	DspCLO1	OTB17104	4	3
	Ascomycota	DspCLO2	OTB14499	1	0
	Ascomycota	DamCLO1	KKY32758	4	3
	Ascomycota	DheCLO1	POS78987	4	3
	Ascomycota	ElaCLO1	EMR66573	5	4
	Ascomycota	FprCLO1	CZR49300	5	4
	Ascomycota	FprCLO2	CZR41846	1	0
	Ascomycota	FpoCLO1	OBS22612	5	4
	Ascomycota	FpoCLO2	OBS24036	1	0
	Ascomycota	FmaCLO1*	CVK98679	5	4
	Ascomycota	FmaCLO2	CVK90206	1	0
	Ascomycota	FfuCLO1	XP_023431665.1	5	4
	Ascomycota	FfuCLO2	XP_023431835	1	0
	Ascomycota	FlaCLO1	KPA46818	1	0
	Ascomycota	FoxCLO1	XP_018237932	1	0
	Ascomycota	FoxCLO2	XP_018256140	5	4
	Ascomycota	FveCLO1	XP_018761344	5	4
	Ascomycota	FveCLO2	XP_018746006	1	0
	Ascomycota	GgrCLO1	XP_008093681	5	4
	Ascomycota	GgrCLO2	XP_008100032	5	4
	Ascomycota	HspCLO1	OTB07450	3	2
	Ascomycota	HspCLO2	OTB07406	4	3
	Ascomycota	HspCLO3	OTB09594	1	0
	Ascomycota	MoCLO2	XP_003708880	3	2
	Ascomycota	MoCLO1	ELQ63821	2	1
	Ascomycota	MoCLO3	ELQ37745	3	2
	Ascomycota	MoCLO4	XP_003717404	2	1
	Ascomycota	MpoCLO1	KLU91837	2	1
	Ascomycota	MriCLO1	OAA40952	4	3
	Ascomycota	MacCLO1	XP_007813582	3	2
	Ascomycota	MthCLO1	XP_003665558	5	4
	Ascomycota	NcCLO1	XP_958990	3	2
	Ascomycota	NteCLO1	XP_009852934	3	2
	Ascomycota	SmaCLO1	XP_003345679	3	2
	Ascomycota	SchCLO1	KEY69579	5	4
	Ascomycota	SchCLO2	KEY69278	1	0
	Ascomycota	SchlCLO1	KFA66825	5	4
	Ascomycota	SchlCLO2	KFA67324	1	0
	Ascomycota	TteCLO1	XP_003653951	5	4
	Ascomycota	TatCLO1	XP_013940696	5	4
	Ascomycota	TgaCLO1	XP_018659574	5	4
	Ascomycota	ThaCLO1	KKP05063	5	4
	Ascomycota	ThaCLO2	PNP52067	6	5
	Ascomycota	TguCLO1	OPB38375	5	4
	Ascomycota	TreCLO1	XP_006961944	5	4
	Ascomycota	TviCLO1	XP_013956494	5	4
	Ascomycota	UviCLO1	KDB17949	4	3
	Ascomycota	VdaCLO1	XP_009651365	3	2
	Ascomycota	XhCLO1	XP_018188918.	3	2	Xylono
	Ascomycota	LsCLO1	ODQ69359	1	0	Saccharo
	Ascomycota	PlaCLO1	ORY76033	1	0	Taphrino
	Ascomycota	ScoCLO1	XP_019026139.1	1	0
